# Supplementary material for: LRP6 promotes invasion and metastasis of colorectal cancer through cytoskeleton dynamics
Source: PubMed Central journal article supplement (PMC5752548; doi:10.18632/oncotarget.22759), 2017-11-30
Supplement: oncotarget-08-109632-s001.pdf [file oncotarget-08-109632-s001.pdf]

# LRP6 promotes invasion and metastasis of colorectal cancer through cytoskeleton dynamics

## SUPPLEMENTARY MATERIALS

A

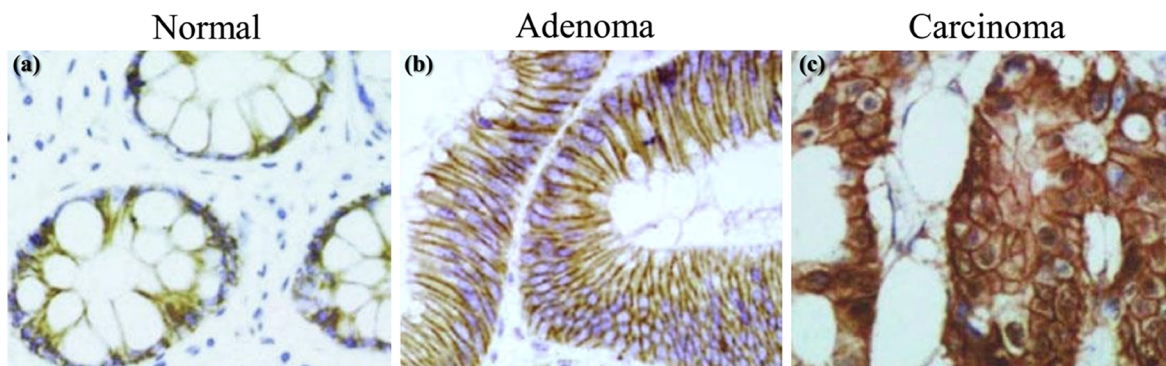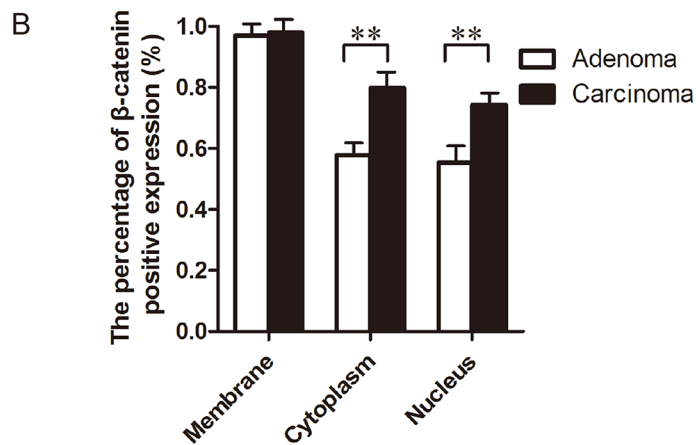

**Supplementary Figure 1: The expression of  $\beta$ -catenin in colorectal tissue.** (A) The representative images of  $\beta$ -catenin staining in normal glandular cells (a), adenoma (b) and carcinoma (c) ( $\times 200$ ). (B) The subcellular  $\beta$ -catenin staining and positive percentage in normal glandular cells, adenoma and carcinoma. \* $p < 0.05$ , \*\* $p < 0.01$ , \*\*\* $p < 0.001$ .

A

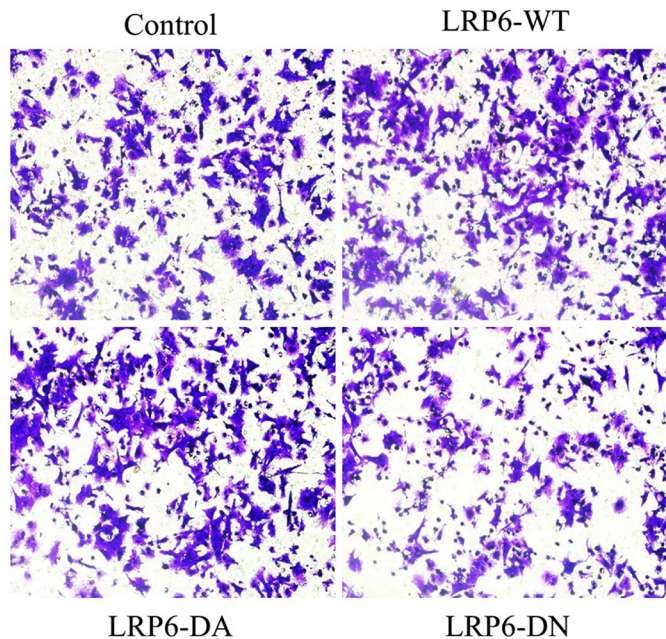

B

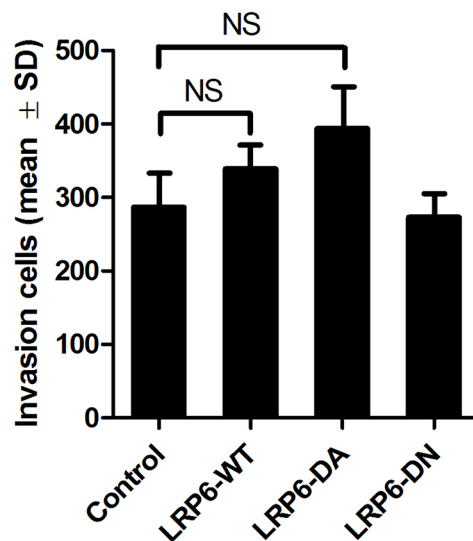

**Supplementary Figure 2: The relationship between LRP6 overexpression and cell invasion in colorectal cancer.** (A) The expression of different domains of LRP6 influenced invasion of cancer cells. Lovo and HCT116 cells with transfection of control vector, LRP6-WT, LRP6-DA and LRP6-DN were subjected to Transwell analysis, respectively ( $\times 200$ ). (B) The number of cells counted in invasion assay and the statistical analysis. The data showed was from Lovo. Values represent mean  $\pm$  SD of three experiments. \*  $p < 0.05$ , \*\*  $p < 0.01$ , \*\*\*  $p < 0.001$ . All of experiments were repeated at least three times.

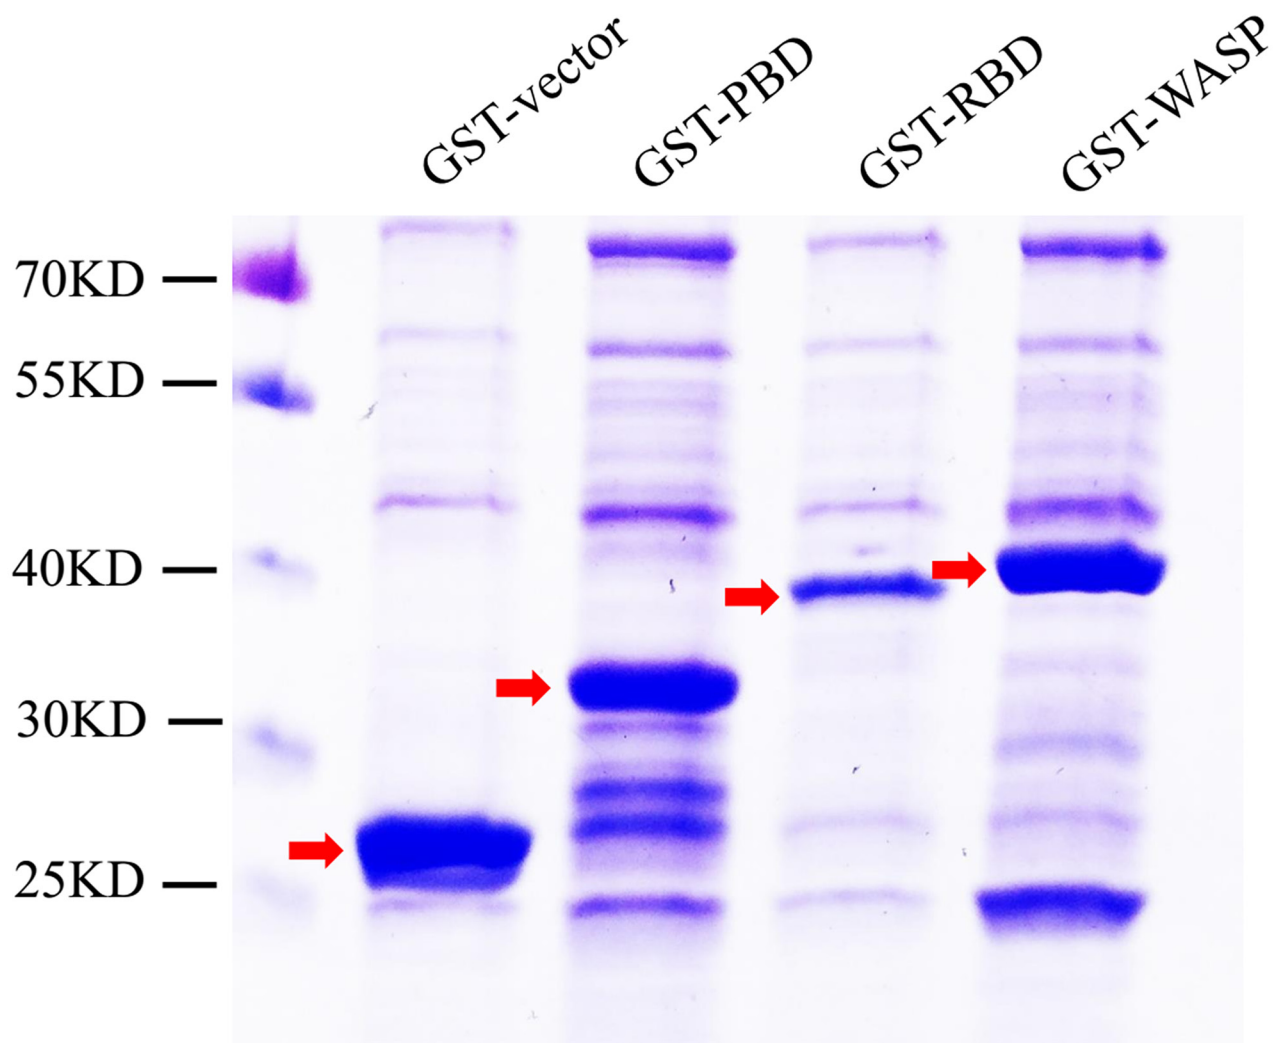

**Supplementary Figure 3: The purified GST fusion protein of GST vector, PBD, RBD and WASP.** The molecular weight of each protein were about 26kDa, 33kDa, 38kDa and 40kDa, respectively. Red arrow indicated the corresponding protein.

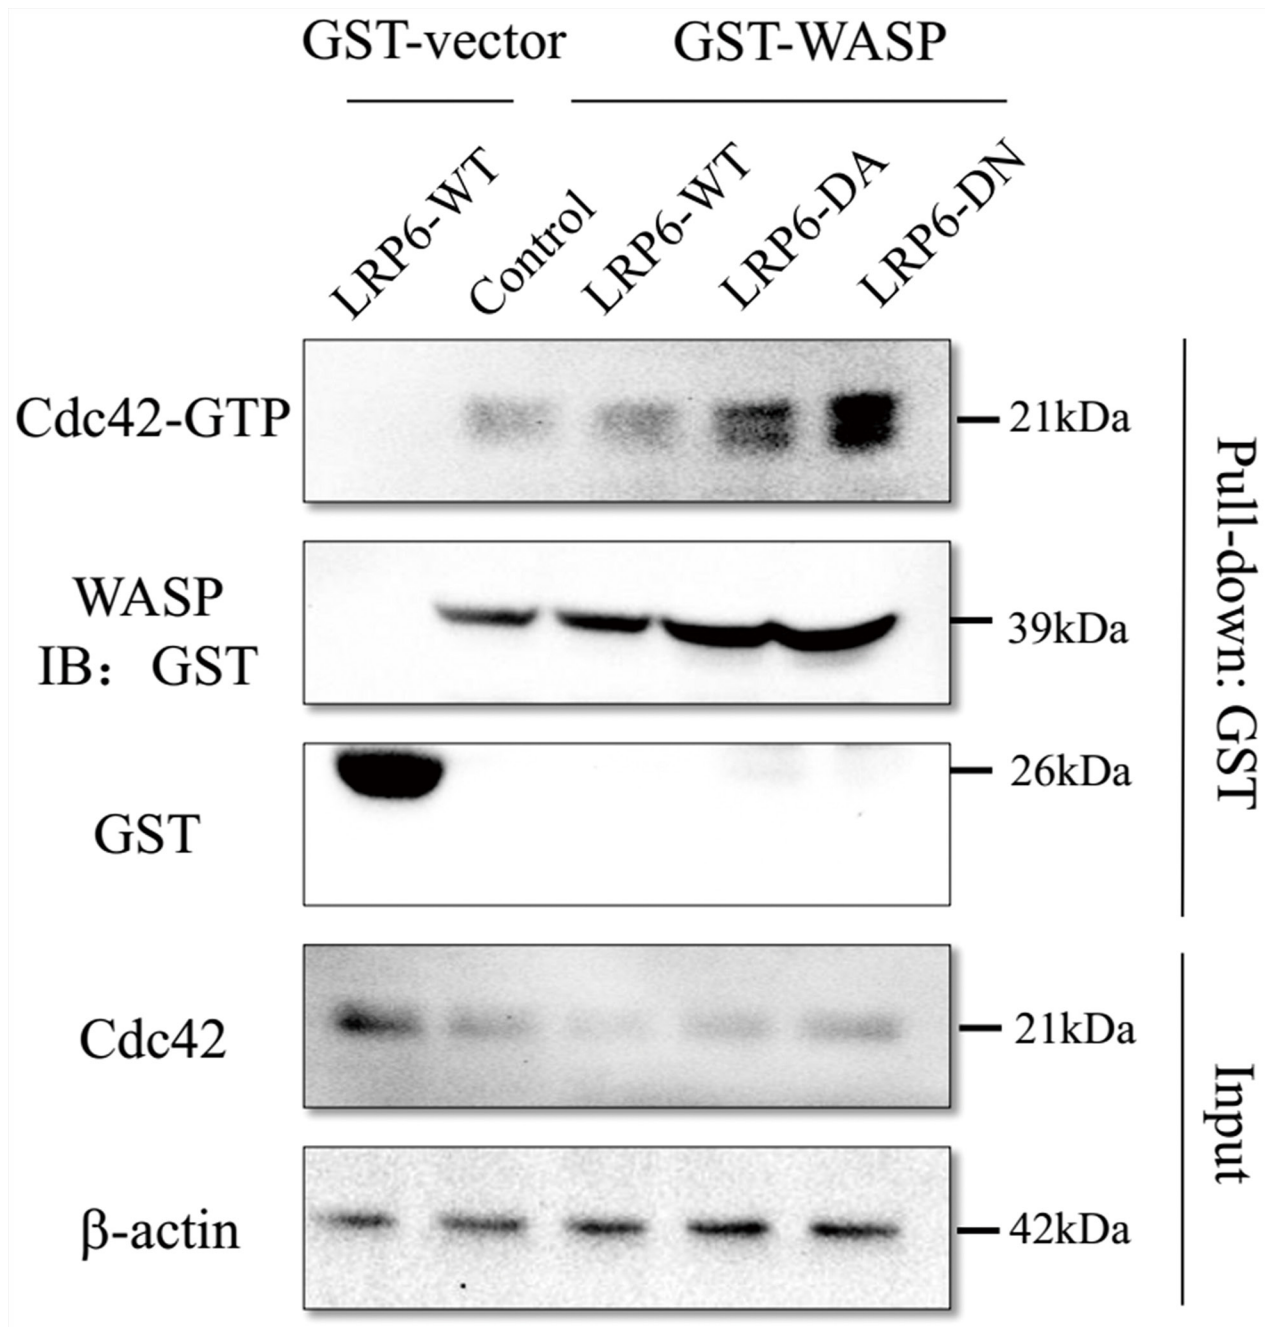

**Supplementary Figure 4: The active GTP-bound Cdc42 level upon LRP6 overexpression.** The GST fusion protein of WASP were expressed in BL21 cells and purified with glutathione agaroses. HCT116 cells were transfected with control vector, LRP6-WT, LRP6-DA and LRP6-DN and cell extracts were mixed with the produced agaroses. Then, the level of Cdc42 in GST pull-down lysate was evaluated by Western Blotting. The data showed was from HCT116.

**Supplementary Table 1: Correlations between p-LRP6 immuno-staining and nuclear translocation of  $\beta$ -catenin in colorectal carcinoma**

|                                        | p-LRP6 expression |    | Total | Significance |                |
|----------------------------------------|-------------------|----|-------|--------------|----------------|
|                                        | -                 | +  |       | $\chi^2$     | <i>p</i> value |
| $\beta$ -catenin nuclear translocation |                   |    | 183   | 6.458        | 0.011*         |
| -                                      | 25                | 22 |       |              |                |
| +                                      | 44                | 92 |       |              |                |

\**p* < 0.05.**Supplementary Table 2: Correlations between p-LRP6 immuno-staining and clinicopathologic parameters in colorectal carcinoma**

|                       | Total | p-LRP6 expression |                  | significance |                |
|-----------------------|-------|-------------------|------------------|--------------|----------------|
|                       |       | Negative (%)      | Positive (%)     | $\chi^2$     | <i>p</i> value |
| Age                   |       |                   |                  | 2.161        | 0.142          |
| <60                   | 64    | 28(43.8)          | 36(56.2)         |              |                |
| $\geq$ 60             | 119   | 39(32.8)          | 80(67.2)         |              |                |
| Gender                |       |                   |                  | 0.036        | 0.850          |
| Male                  | 100   | 31(31)            | 52(52)           |              |                |
| Female                | 83    | 31(37.3)          | 52(62.7)         |              |                |
| Tumor size (cm)       | 150   | 4.06 $\pm$ 1.878  | 4.64 $\pm$ 2.107 |              | 0.657          |
| Depth of invasion     |       |                   |                  | 36.801       | <0.001***      |
| $\leq$ T2             | 68    | 44(64.7)          | 24(35.3)         |              |                |
| T3-T4                 | 115   | 23 (20)           | 92(80)           |              |                |
| Lymph node metastasis |       |                   |                  | 12.995       | <0.001***      |
| No                    | 80    | 41(51.3)          | 39(48.8)         |              |                |
| Yes                   | 77    | 18(23.4)          | 59(76.6)         |              |                |
| Dukes stage           |       |                   |                  | 13.904       | <0.001***      |
| A-B                   | 97    | 47(48.5)          | 50(51.5)         |              |                |
| C-D                   | 85    | 19(22.4)          | 66(77.6)         |              |                |
| TNM stage             |       |                   |                  | 13.100       | <0.001***      |
| 0-II                  | 99    | 48(48.5)          | 51(51.5)         |              |                |
| III-IV                | 84    | 19(22.6)          | 65(77.4)         |              |                |

\*\*\**p* < 0.001.
